# Supplementary material
Source: PubMed Central journal article supplement (PMC4899295)
Supplement: NIHMS764208-supplement-17.pdf [file NIHMS764208-supplement-17.pdf]

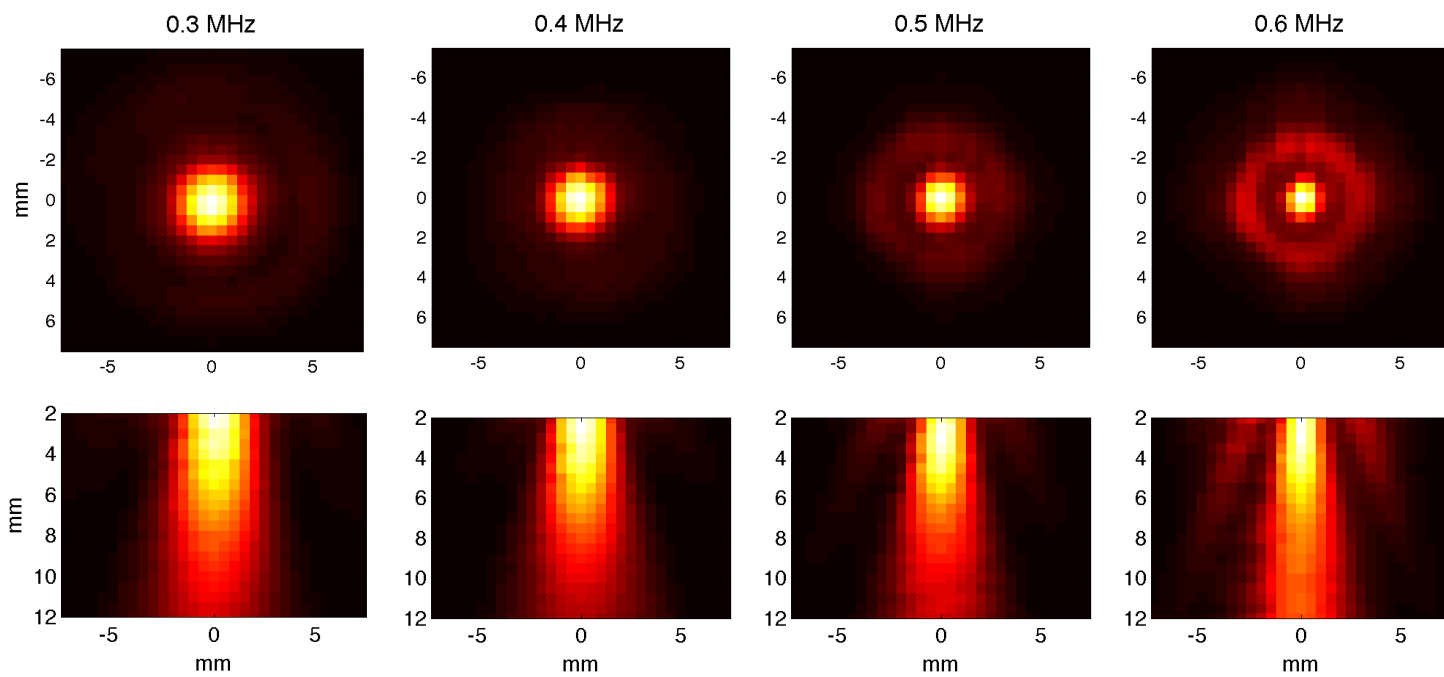

**Figure S1: Normalized intensity plots measured by hydrophone for the Planar 500 kHz transducer setup (Experiment A) in the transverse plane (upper row,  $z = 2\text{mm}$ ) and the axial plane (bottom row)**
