# Supplementary material
Source: PubMed Central journal article supplement (PMC4899295)
Supplement: NIHMS764208-supplement-19.pdf [file NIHMS764208-supplement-19.pdf]

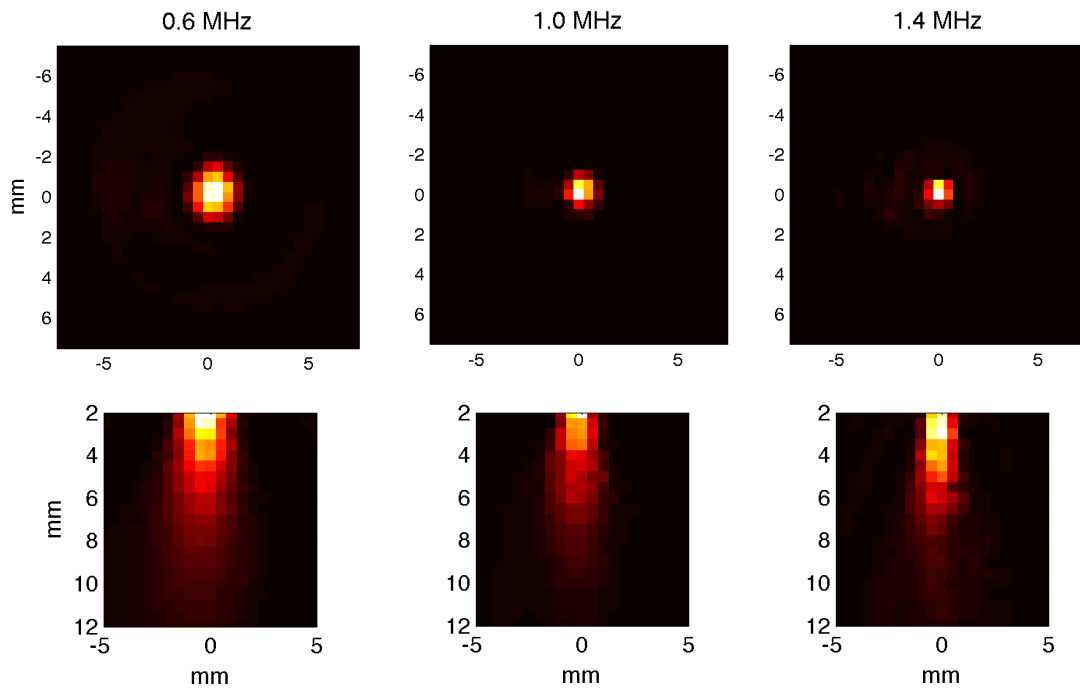

**Figure S2: Normalized intensity plots measured by hydrophone for the Focused 1 MHz transducer setup (Experiment B) in the transverse plane (upper row,  $z = 2\text{mm}$ ) and the axial plane (bottom row)**
