# Supplementary material
Source: PubMed Central journal article supplement (PMC4899295)
Supplement: NIHMS764208-supplement-23.pdf [file NIHMS764208-supplement-23.pdf]

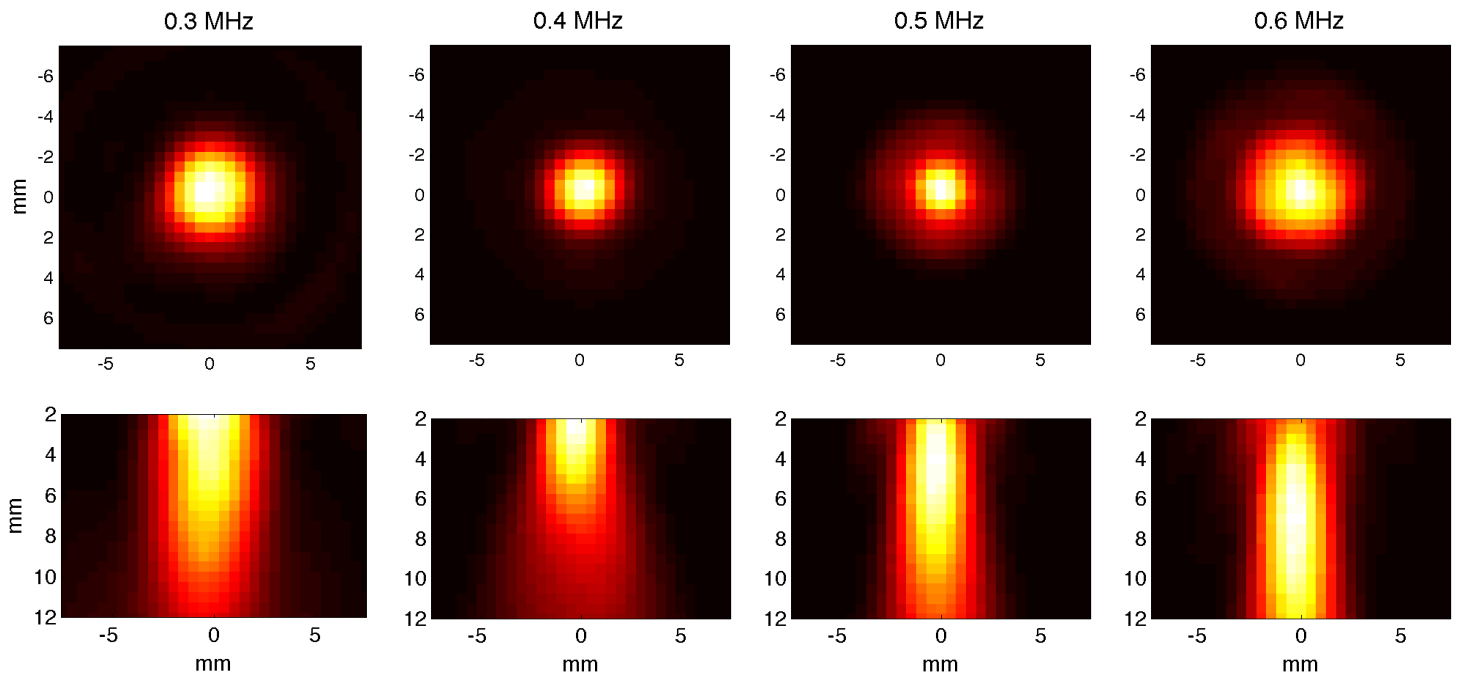

Figure S4: Normalized intensity plots measured by hydrophone for the Planar 500 kHz transducer setup (Experiment D) in the transverse plane (upper row,  $z = 2\text{mm}$ ) and the axial plane (bottom row)
