# Supplementary material
Source: PubMed Central journal article supplement (PMC4899295)
Supplement: NIHMS764208-supplement-29.pdf [file NIHMS764208-supplement-29.pdf]

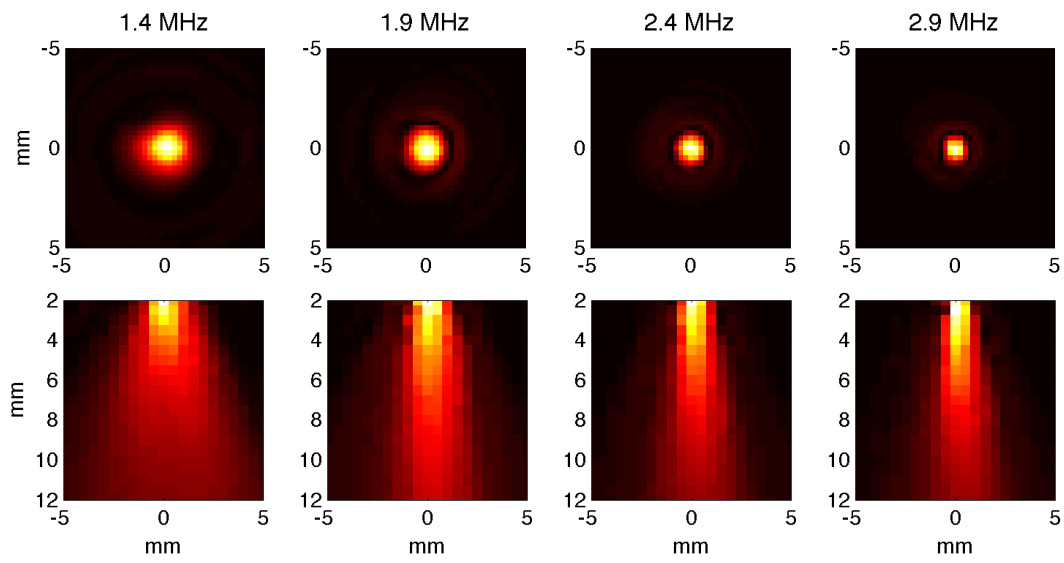

**Figure S7: Normalized pressure plots measured by hydrophone for the Focused 2.25 MHz transducer setup (Experiment C and E) in the transverse plane (upper row,  $z = 2\text{mm}$ ) and the axial plane (bottom row).**
